# Supplementary material for: The Impact of Physical Activity Restrictions on Health-Related Fitness in Children with Congenital Heart Disease
Source: MDPI journal article supplement (doi:10.3390/ijerph19084426), 2022-04-07
Supplement: s1 [file s1]

**Table S1. BMI-for-age Z scores differences according to PA restrictions in boys and girls**

| PA restrictions   | BMI Z scores (WHO) |      | BMI Z scores (CDC) |       | BMI Z score (WHO) |      | BMI Z score (CDC) |      |
|-------------------|--------------------|------|--------------------|-------|-------------------|------|-------------------|------|
|                   | M ± SD             | p    | M ± SD             | p     | M ± SD            | p    | M ± SD            | p    |
| <u>Physicians</u> | <u>Boys</u>        |      |                    |       | <u>Girls</u>      |      |                   |      |
| Any               |                    |      |                    |       |                   |      |                   |      |
| Restriction       | -0.39 ± 1.03       |      | 0.54 ± 1.13        |       | 0.079 ± 1.075     |      | -0.39 ± 1.03      |      |
| W/O restriction   | 0.074 ± 0.818      | 0.22 | 0.52 ± 1.27        | 0.21  | 0.14 ± 0.97       | 0.95 | 0.074 ± 0.818     | 0.86 |
| Exertion          |                    |      |                    |       |                   |      |                   |      |
| Restriction       | -0.38 ± 1.14       |      | 0.32 ± 1.30        |       | -0.023 ± 1.16     |      | -0.38 ± 1.14      |      |
| W/O restriction   | 0.19 ± 0.95        | 0.65 | 0.57 ± 1.16        | 0.39  | 0.15 ± 0.97       | 0.62 | 0.19 ± 0.95       | 0.65 |
| Competition       |                    |      |                    |       |                   |      |                   |      |
| Restriction       | -0.49 ± 1.11       |      | 0.50 ± 1.20        |       | 0.10 ± 1.02       |      | -0.49 ± 1.11      |      |
| W/O restriction   | 0.0047 ± 0.79      | 0.19 | 0.54 ± 1.18        | 0.18  | 0.12 ± 1.00       | 0.91 | 0.0047 ± 0.79     | 0.97 |
| Body contact      |                    |      |                    |       |                   |      |                   |      |
| Restriction       | -0.48 ± 1.20       |      | 0.64 ± 0.91        |       | 0.26 ± 0.77       |      | -0.48 ± 1.20      |      |
| W/O restriction   | -0.022 ± 0.68      | 0.20 | 0.46 ± 1.33        | 0.18  | 0.026 ± 1.12      | 0.61 | -0.022 ± 0.68     | 0.44 |
| <u>Parents</u>    |                    |      |                    |       |                   |      |                   |      |
| Any               |                    |      |                    |       |                   |      |                   |      |
| Restriction       | -0.24 ± 1.04       |      | 0.37 ± 1.31        |       | -0.048 ± 1.21     |      | -0.24 ± 1.04      |      |
| W/O restriction   | 0.16 ± 1.21        | 0.15 | 0.077 ± 1.46       | 0.20  | -0.28 ± 1.34      | 0.29 | 0.16 ± 1.21       | 0.33 |
| Exertion          |                    |      |                    |       |                   |      |                   |      |
| Restriction       | 0.11 ± 1.30        |      | 0.21 ± 0.97        |       | -0.16 ± 0.92      |      | 0.11 ± 1.30       |      |
| W/O restriction   | 0.023 ± 1.15       | 0.84 | 0.20 ± 1.43        | 0.81  | -0.19 ± 1.31      | 0.99 | 0.023 ± 1.15      | 0.96 |
| Competition       |                    |      |                    |       |                   |      |                   |      |
| Restriction       | -0.012 ± 1.01      |      | 0.35 ± 0.68        |       | 0.15 ± 0.67       |      | -0.012 ± 1.01     |      |
| W/O restriction   | 0.044 ± 1.16       | 0.42 | 0.19 ± 1.44        | 0.463 | -0.21 ± 1.32      | 0.78 | 0.044 ± 1.16      | 0.45 |
| Body contact      |                    |      |                    |       |                   |      |                   |      |
| Restriction       | -0.45 ± 1.19       |      | 0.37 ± 1.45        |       | -0.051 ± 1.36     |      | -0.45 ± 1.19      |      |
| W/O restriction   | 0.12 ± 0.92        | 0.07 | 0.13 ± 1.38        | 0.09  | -0.24 ± 1.26      | 0.42 | 0.12 ± 0.92       | 0.48 |
| <u>Both</u>       |                    |      |                    |       |                   |      |                   |      |
| Any               |                    |      |                    |       |                   |      |                   |      |
| Restriction       | -0.27 ± 1.09       |      | 0.67 ± 1.33        |       | 0.23 ± 1.12       |      | -0.27 ± 1.09      |      |
| W/O restriction   | -0.11 ± 0.83       | 0.71 | 0.15 ± 0.67        | 0.62  | -0.20 ± 0.60      | 0.23 | -0.11 ± 0.83      | 0.24 |
| Exertion          |                    |      |                    |       |                   |      |                   |      |
| Restriction       | -0.053 ± 1.13      |      | 0.12 ± 1.09        |       | -0.24 ± 1.02      |      | -0.053 ± 1.13     |      |
| W/O restriction   | -0.32 ± 0.92       | 0.54 | 0.62 ± 1.22        | 0.66  | 0.19 ± 1.01       | 0.33 | -0.32 ± 0.92      | 0.32 |
| Competition       |                    |      |                    |       |                   |      |                   |      |
| Restriction       | -0.43 ± 1.20       |      | 0.45 ± 1.23        |       | 0.063 ± 1.04      |      | -0.43 ± 1.20      |      |
| W/O restriction   | -0.048 ± 0.80      | 0.37 | 0.58 ± 1.19        | 0.37  | 0.15 ± 1.02       | 0.75 | -0.048 ± 0.80     | 0.80 |
| Body contact      |                    |      |                    |       |                   |      |                   |      |
| Restriction       | 0.10 ± 1.17        |      | 0.83 ± 1.36        |       | 0.37 ± 1.18       |      | 0.10 ± 1.17       |      |
| W/O restriction   | -0.33 ± 0.93       | 0.38 | 0.24 ± 0.96        | 0.50  | -0.13 ± 0.79      | 0.12 | -0.33 ± 0.93      | 0.12 |

**Table S2. Physical competence according to PA restrictions in boys**

| PA restrictions   | Locomotive Pctl |      | Object Pctl |        | TGMD-2 Pctl |       | Hand grip Z scores |      | S&R Z scores |       |
|-------------------|-----------------|------|-------------|--------|-------------|-------|--------------------|------|--------------|-------|
|                   | M ± SD          | p    | M ± SD      | p      | M ± SD      | p     | M ± SD             | p    | M ± SD       | p     |
| <u>Physicians</u> |                 |      |             |        |             |       |                    |      |              |       |
| Any               |                 |      |             |        |             |       |                    |      |              |       |
| Restriction       | 55.6 ± 30.5     |      | 67.2 ± 27.9 |        | 58.6 ± 29.9 |       | -0.20 ± 0.83       |      | 2.34 ± 1.78  |       |
| W/O restriction   | 66.8 ± 28.8     | 0.34 | 52.2 ± 28.3 | 0.20   | 59.0 ± 29.1 | 0.97  | 0.35 ± 1.03        | 0.11 | 1.90 ± 2.14  | 0.55  |
| Exertion          |                 |      |             |        |             |       |                    |      |              |       |
| Restriction       | 47.8 ± 31.5     |      | 56.7 ± 30.9 |        | 54.0 ± 31.8 |       | -0.09 ± 0.86       |      | 3.23 ± 1.05  |       |
| W/O restriction   | 63.9 ± 28.7     | 0.18 | 65.1 ± 27.6 | 0.47   | 60.9 ± 28.3 | 0.57  | 0.01 ± 0.97        | 0.76 | 1.76 ± 1.98  | 0.04* |
| Competition       |                 |      |             |        |             |       |                    |      |              |       |
| Restriction       | 57.9 ± 31.6     |      | 54.5 ± 28.0 |        | 53.5 ± 27.0 |       | -0.21 ± 0.89       |      | 1.90 ± 1.80  |       |
| W/O restriction   | 61.5 ± 29.9     | 0.77 | 79.2 ± 64.5 | 0.03*  | 68.3 ± 31.1 | 0.24  | 0.19 ± 1.09        | 0.32 | 1.67 ± 1.96  | 0.76  |
| Body contact      |                 |      |             |        |             |       |                    |      |              |       |
| Restriction       | 62.7 ± 25.5     |      | 71.3 ± 28.3 |        | 63.7 ± 27.2 |       | -0.04 ± 0.96       |      | 2.06 ± 1.79  |       |
| W/O restriction   | 56.3 ± 33.7     | 0.56 | 55.8 ± 27.5 | 0.16   | 55.0 ± 30.8 | 0.45  | 0.002 ± 0.92       | 0.89 | 2.32 ± 1.98  | 0.70  |
| <u>Parents</u>    |                 |      |             |        |             |       |                    |      |              |       |
| Any               |                 |      |             |        |             |       |                    |      |              |       |
| Restriction       | 60.4 ± 27.3     |      | 64.2 ± 28.1 |        | 62.2 ± 30.2 |       | -0.09 ± 0.87       |      | 1.81 ± 2.11  |       |
| W/O restriction   | 59.1 ± 27.6     | 0.84 | 60.5 ± 31.4 | 0.61   | 61.8 ± 26.9 | 0.95  | 0.15 ± 0.94        | 0.25 | 2.65 ± 1.46  | 0.03* |
| Exertion          |                 |      |             |        |             |       |                    |      |              |       |
| Restriction       | 63.3 ± 25.7     |      | 66.0 ± 29.2 |        | 67.6 ± 26.9 |       | 0.09 ± 1.24        |      | 1.47 ± 2.47  |       |
| W/O restriction   | 59.0 ± 27.7     | 0.64 | 61.1 ± 30.6 | 0.65   | 61.4 ± 29.4 | 0.55  | -0.04 ± 0.86       | 0.67 | 2.52 ± 1.58  | 0.08  |
| Competition       |                 |      |             |        |             |       |                    |      |              |       |
| Restriction       | -               |      | -           |        | -           |       | -                  |      | -            |       |
| W/O restriction   | -               | -    | -           | -      | -           | -     | -                  | -    | -            | -     |
| Body contact      |                 |      |             |        |             |       |                    |      |              |       |
| Restriction       | 59.7 ± 29.3     |      | 60.6 ± 30.9 |        | 62.4 ± 29.6 |       | -0.01 ± 0.90       |      | 1.99 ± 1.95  |       |
| W/O restriction   | 59.5 ± 27.2     | 0.98 | 67.5 ± 28.9 | 0.47   | 60.2 ± 26.8 | 0.81  | -0.09 ± 0.88       | 0.77 | 2.49 ± 1.65  | 0.32  |
| <u>Both</u>       |                 |      |             |        |             |       |                    |      |              |       |
| Any               |                 |      |             |        |             |       |                    |      |              |       |
| Restriction       | 65.7 ± 29.0     |      | 42.8 ± 28.0 |        | 45.4 ± 24.7 |       | 0.52 ± 0.62        |      | 1.83 ± 1.73  |       |
| W/O restriction   | 63.9 ± 27.2     | 0.88 | 77.5 ± 22.1 | 0.01*  | 72.4 ± 29.4 | 0.04* | -0.03 ± 1.09       | 0.14 | 1.38 ± 1.96  | 0.58  |
| Exertion          |                 |      |             |        |             |       |                    |      |              |       |
| Restriction       | 61.2 ± 31.8     |      | 59.8 ± 29.6 |        | 58.0 ± 26.7 |       | -0.02 ± 1.32       |      | 1.71 ± 1.84  |       |
| W/O restriction   | 67.6 ± 25.9     | 0.61 | 73.6 ± 27.8 | 0.31   | 70.4 ± 35.4 | 0.38  | 0.28 ± 0.71        | 0.49 | 1.64 ± 1.82  | 0.94  |
| Competition       |                 |      |             |        |             |       |                    |      |              |       |
| Restriction       | 64.5 ± 30.5     |      | 51.8 ± 27.7 |        | 54.5 ± 28.1 |       | -0.21 ± 0.98       |      | 1.63 ± 1.85  |       |
| W/O restriction   | 65.5 ± 26.8     | 0.93 | 81.9 ± 21.9 | 0.01*  | 73.2 ± 49.3 | 0.18  | 0.44 ± 0.91        | 0.12 | 1.70 ± 1.81  | 0.93  |
| Body contact      |                 |      |             |        |             |       |                    |      |              |       |
| Restriction       | 68.9 ± 26.3     |      | 57.8 ± 29.6 |        | 58.3 ± 32.1 |       | 0.41 ± 1.04        |      | 2.26 ± 1.37  |       |
| W/O restriction   | 63.8 ± 29.0     | 0.71 | 88.0 ± 18.6 | 0.002* | 76.8 ± 20.3 | 0.16  | 0.07 ± 0.97        | 0.48 | 1.44 ± 1.91  | 0.28  |

\*Significant difference ( $p < 0.05$ )

**Table S3. Physical competence according to PA restrictions in girls**

| PA restrictions   | Locomotive Pctl |       | Object Pctl |          | TGMD-2 Pctl |         | Hand grip Z scores |        | S&R Z scores |       |
|-------------------|-----------------|-------|-------------|----------|-------------|---------|--------------------|--------|--------------|-------|
|                   | M ± SD          | p     | M ± SD      | p        | M ± SD      | p       | M ± SD             | p      | M ± SD       | p     |
| <u>Physicians</u> |                 |       |             |          |             |         |                    |        |              |       |
| Any               |                 |       |             |          |             |         |                    |        |              |       |
| Restriction       | 44.2 ± 25.9     |       | 37.4 ± 29.9 |          | 33.4 ± 28.8 |         | -0.29 ± 1.09       |        | -0.84 ± 1.05 |       |
| W/O restriction   | 44.0 ± 27.6     | 0.98  | 50.5 ± 26.5 | 0.17     | 46.3 ± 27.8 | 0.17    | 0.13 ± 0.75        | 0.13   | -1.28 ± 1.14 | 0.19  |
| Exertion          |                 |       |             |          |             |         |                    |        |              |       |
| Restriction       | 45.0 ± 19.5     |       | 42.7 ± 28.1 |          | 36.7 ± 28.5 |         | -0.56 ± 1.32       |        | -0.79 ± 1.08 |       |
| W/O restriction   | 44.0 ± 27.5     | 0.93  | 41.9 ± 29.7 | 0.95     | 38.3 ± 29.3 | 0.90    | -0.04 ± 0.90       | 0.16   | -1.04 ± 1.10 | 0.53  |
| Competition       |                 |       |             |          |             |         |                    |        |              |       |
| Restriction       | 48.3 ± 26.0     |       | 29.8 ± 28.0 |          | 30.3 ± 30.4 |         | -0.27 ± 0.97       |        | -0.86 ± 1.00 |       |
| W/O restriction   | 41.7 ± 28.0     | 0.45  | 52.4 ± 27.0 | 0.01*    | 44.6 ± 27.4 | 0.14    | 0.004 ± 0.87       | 0.35   | -1.24 ± 1.10 | 0.27  |
| Body contact      |                 |       |             |          |             |         |                    |        |              |       |
| Restriction       | 44.0 ± 26.4     |       | 41.0 ± 32.9 |          | 34.3 ± 30.3 |         | -0.09 ± 1.05       |        | -0.99 ± 1.18 |       |
| W/O restriction   | 44.2 ± 26.5     | 0.98  | 42.7 ± 27.2 | 0.85     | 40.3 ± 28.3 | 0.52    | -0.22 ± 0.93       | 0.69   | -1.00 ± 0.94 | 0.97  |
| <u>Parents</u>    |                 |       |             |          |             |         |                    |        |              |       |
| Any               |                 |       |             |          |             |         |                    |        |              |       |
| Restriction       | 43.2 ± 30.8     |       | 32.8 ± 26.7 |          | 34.6 ± 29.7 |         | -0.33 ± 1.05       |        | -1.00 ± 1.06 |       |
| W/O restriction   | 51.4 ± 22.4     | 0.09  | 50.8 ± 24.4 | 0.0003** | 50.5 ± 23.5 | 0.002** | 0.19 ± 1.13        | 0.009* | -0.50 ± 1.19 | 0.01* |
| Exertion          |                 |       |             |          |             |         |                    |        |              |       |
| Restriction       | 27.3 ± 18.1     |       | 33.1 ± 30.6 |          | 24.6 ± 27.6 |         | -0.57 ± 0.85       |        | -0.71 ± 1.12 |       |
| W/O restriction   | 49.5 ± 26.1     | 0.02* | 44.6 ± 26.4 | 0.27     | 45.7 ± 26.7 | 0.04*   | 0.02 ± 1.13        | 0.09   | -0.70 ± 1.17 | 0.98  |
| Competition       |                 |       |             |          |             |         |                    |        |              |       |
| Restriction       | 26.0 ± 27.0     |       | 13.1 ± 13.7 |          | 16.7 ± 21.8 |         | -0.83 ± 0.76       |        | -1.13 ± 1.16 |       |
| W/O restriction   | 49.6 ± 25.6     | 0.02* | 45.9 ± 26.1 | 0.0003** | 46.2 ± 26.5 | 0.005*  | 0.05 ± 1.13        | 0.008* | -0.67 ± 1.16 | 0.25  |
| Body contact      |                 |       |             |          |             |         |                    |        |              |       |
| Restriction       | 46.3 ± 30.3     |       | 35.1 ± 25.1 |          | 37.5 ± 28.8 |         | -0.17 ± 1.11       |        | -0.87 ± 0.97 |       |
| W/O restriction   | 48.9 ± 24.8     | 0.65  | 46.8 ± 26.6 | 0.03*    | 46.7 ± 26.3 | 0.11    | 0.04 ± 1.13        | 0.32   | -0.64 ± 1.22 | 0.33  |
| <u>Both</u>       |                 |       |             |          |             |         |                    |        |              |       |
| Any               |                 |       |             |          |             |         |                    |        |              |       |
| Restriction       | 36.6 ± 26.6     |       | 37.3 ± 28.7 |          | 35.6 ± 29.8 |         | -0.14 ± 0.89       |        | -1.07 ± 1.00 |       |
| W/O restriction   | 47.9 ± 26.8     | 0.24  | 52.4 ± 29.7 | 0.15     | 43.2 ± 28.9 | 0.48    | -0.15 ± 0.88       | 0.99   | -1.36 ± 1.09 | 0.43  |
| Exertion          |                 |       |             |          |             |         |                    |        |              |       |
| Restriction       | 37.6 ± 25.2     |       | 43.7 ± 28.9 |          | 38.5 ± 29.4 |         | -0.38 ± 0.73       |        | -1.20 ± 0.98 |       |
| W/O restriction   | 46.3 ± 27.4     | 0.44  | 41.2 ± 30.0 | 0.84     | 34.6 ± 30.9 | 0.75    | -0.09 ± 0.91       | 0.44   | -1.14 ± 1.05 | 0.88  |
| Competition       |                 |       |             |          |             |         |                    |        |              |       |
| Restriction       | 48.7 ± 26.0     |       | 30.9 ± 28.2 |          | 30.4 ± 31.0 |         | -0.20 ± 1.00       |        | -0.93 ± 1.02 |       |
| W/O restriction   | 41.7 ± 27.8     | 0.43  | 50.4 ± 28.1 | 0.04*    | 43.8 ± 27.3 | 0.17    | -0.10 ± 0.80       | 0.73   | -1.33 ± 1.02 | 0.24  |
| Body contact      |                 |       |             |          |             |         |                    |        |              |       |
| Restriction       | 48.2 ± 28.1     |       | 39.5 ± 29.9 |          | 35.5 ± 29.4 |         | -0.22 ± 0.84       |        | -1.24 ± 0.84 |       |
| W/O restriction   | 41.5 ± 26.0     | 0.44  | 44.1 ± 29.6 | 0.64     | 40.4 ± 29.9 | 0.61    | -0.07 ± 0.92       | 0.62   | -1.06 ± 1.19 | 0.59  |

\*Significant difference ( $p < 0.05$ )

\*\* Significant difference after correction for multiple comparison ( $p < 0.01$ )
